# Supplementary material
Source: PubMed Central journal article supplement (PMC4280798)
Supplement: NIHMS630790-supplement-1.pdf [file NIHMS630790-supplement-1.pdf]

## Supplementary Information

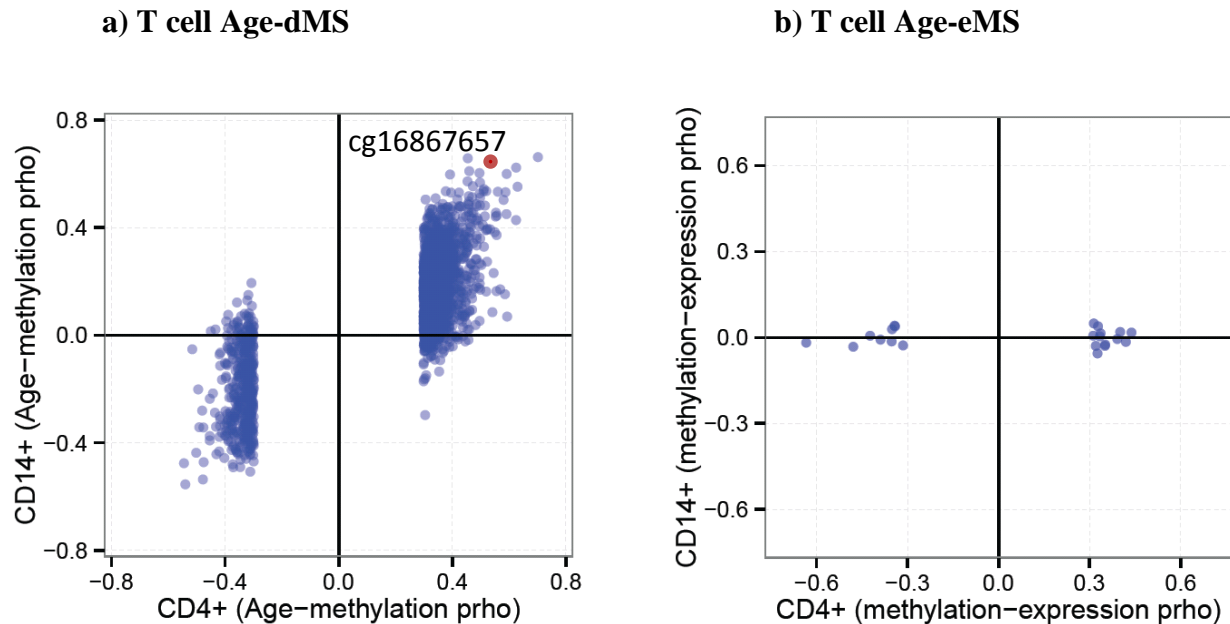

**Supplementary Figure 1 | Replication of T cell Age-dMS and Age-eMS in 1,264 monocyte samples.** Analysis of age and methylation in 227 T cell (CD4+) samples included 436,393 CpG methylation sites, of which 2,595 had methylation associated with age (age-dMS;  $FDR < 0.001$ ): 546 negatively associated with age (hypo age-dMS), 2,049 positively associated with age (hyper age-dMS); see **Supplementary Table 2**. **a)** Comparison of the partial correlation (prho) between methylation and age in 227 T cell samples (x-axis) compared to the correlation detected in 1,264 monocyte samples (CD14+, y-axis). The most significant T cell age-dMS (red circle, cg16867657,  $prho = 0.70$ ,  $FDR = 6.72 \times 10^{-28}$ ) was detected on chromosome 6 in the *ELOVL2* (*ELOVL* fatty acid elongase 2) promoter. **b)** Comparison of the correlation between methylation and *cis*-gene expression for age-dMS associated with *cis*-gene expression in 227 T cells (22 CD4+ age-eMS,  $FDR < 0.001$ , x-axis; restricted to age-dMS detected in both monocytes and T cells  $FDR < 0.001$ ), compared to the correlation in 1,264 monocyte samples (y-axis). Linear regression analysis also included the following covariates: race, sex, site of data collection, and residual sample contamination with non-targeted cells (see **Methods**).

**Supplementary Table 1 | Population characteristics for all participants included in analysis (and by race)**

| <b>Variable</b>          | <b>All (n = 1,264)</b> | <b>Caucasian (n = 590)</b> | <b>Hispanic (n = 402)</b> | <b>African-American (n = 272)</b> |
|--------------------------|------------------------|----------------------------|---------------------------|-----------------------------------|
| Age (years)              | 60 ±10                 | 60 ± 10                    | 59 ± 9                    | 61 ± 9                            |
| Women                    | 650 (51%)              | 285 (48%)                  | 202 (50%)                 | 163 (60%)                         |
| Former smoker            | 358 (50%)              | 183 (53%)                  | 104 (49%)                 | 71 (44%)                          |
| Current smoker           | 69 (10%)               | 31 (9%)                    | 18 (8%)                   | 20 (12%)                          |
| Pulse pressure (mmHg)    | 58 ± 18                | 56 ± 17                    | 57 ± 18                   | 62 ± 18                           |
| BMI (kg/m <sup>2</sup> ) | 30 ± 6                 | 29 ± 5                     | 30 ± 5                    | 31 ± 6                            |
| Hypertension             | 596 (61%)              | 278 (55%)                  | 163 (58%)                 | 155 (78%)                         |
| Diabetic                 | 289 (23%)              | 81 (14%)                   | 106 (26%)                 | 102 (38%)                         |

Mean ± standard deviation provided for continuous variables; count (percentage) provided for discrete variables

## Supplementary Table 2 | Association of major histocompatibility complex (MHC) class I and II mRNA expression transcripts with age

| a) MHC class I |                   |     |               |               |                 |                 |
|----------------|-------------------|-----|---------------|---------------|-----------------|-----------------|
| Gene           | Illumina probe ID | Chr | Age beta      | SE            | P value         | FDR             |
| <i>TAP2</i>    | ILMN_1777565      | 6   | <b>0.0057</b> | <b>0.0012</b> | <b>3.64E-06</b> | <b>2.00E-05</b> |
| <i>TAPBP</i>   | ILMN_1742450      | 6   | <b>0.0031</b> | <b>0.0008</b> | <b>1.28E-04</b> | <b>3.09E-04</b> |
| <i>TAPBP</i>   | ILMN_1782851      | 6   | <b>0.0045</b> | <b>0.0012</b> | <b>2.59E-04</b> | <b>5.42E-04</b> |
| <i>HLA-E</i>   | ILMN_1765258      | 6   | <b>0.0018</b> | <b>0.0006</b> | <b>3.78E-03</b> | <b>4.87E-03</b> |
| <i>HLA-B</i>   | ILMN_1778401      | 6   | <b>0.0013</b> | <b>0.0006</b> | <b>0.02</b>     | <b>0.02</b>     |
| <i>TAP2</i>    | ILMN_1759250      | 6   | <b>0.0027</b> | <b>0.0013</b> | <b>0.04</b>     | <b>0.03</b>     |
| <i>HLA-C</i>   | ILMN_1721113      | 6   | 0.0049        | 0.0030        | 0.11            | 0.07            |
| <i>MICB</i>    | ILMN_1708006      | 6   | 0.0009        | 0.0007        | 0.21            | 0.12            |
| <i>HLA-F</i>   | ILMN_1762861      | 6   | 0.0008        | 0.0008        | 0.36            | 0.18            |
| <i>MICA</i>    | ILMN_1797929      | 6   | 0.0010        | 0.0013        | 0.46            | 0.21            |
| <i>HLA-F</i>   | ILMN_2186806      | 6   | 0.0006        | 0.0009        | 0.48            | 0.22            |
| <i>HLA-A</i>   | ILMN_1671054      | 6   | -0.0007       | 0.0012        | 0.56            | 0.24            |
| <i>HLA-C</i>   | ILMN_2150787      | 6   | 0.0006        | 0.0059        | 0.92            | 0.34            |
| <i>HLA-G</i>   | ILMN_1656670      | 6   | -0.00004      | 0.0010        | 0.97            | 0.35            |

  

| b) MHC class II |                   |     |               |               |                 |                 |
|-----------------|-------------------|-----|---------------|---------------|-----------------|-----------------|
| Gene            | Illumina probe ID | Chr | Age beta      | SE            | P value         | FDR             |
| <i>CD74</i>     | ILMN_1761464      | 5   | <b>0.0060</b> | <b>0.0012</b> | <b>2.39E-07</b> | <b>2.54E-06</b> |
| <i>HLA-DPA1</i> | ILMN_1772218      | 6   | <b>0.0041</b> | <b>0.0008</b> | <b>4.12E-07</b> | <b>3.90E-06</b> |
| <i>CD74</i>     | ILMN_2379644      | 5   | <b>0.0039</b> | <b>0.0008</b> | <b>1.10E-06</b> | <b>8.11E-06</b> |
| <i>CD74</i>     | ILMN_1736567      | 5   | <b>0.0036</b> | <b>0.0007</b> | <b>1.17E-06</b> | <b>8.41E-06</b> |
| <i>HLA-DMA</i>  | ILMN_1695311      | 6   | <b>0.0024</b> | <b>0.0007</b> | <b>3.04E-04</b> | <b>6.19E-04</b> |
| <i>HLA-DOA</i>  | ILMN_1659075      | 6   | <b>0.0048</b> | <b>0.0017</b> | <b>5.09E-03</b> | <b>6.18E-03</b> |
| <i>HLA-DRB3</i> | ILMN_1717261      | 6   | <b>0.0035</b> | <b>0.0016</b> | <b>0.03</b>     | <b>0.03</b>     |
| <i>HLA-DPB1</i> | ILMN_1749070      | 6   | <b>0.0028</b> | <b>0.0016</b> | <b>0.07</b>     | <b>0.05</b>     |
| <i>HLA-DRB4</i> | ILMN_1752592      | 6   | 0.0024        | 0.0014        | 0.09            | 0.06            |
| <i>HLA-DQB1</i> | ILMN_1661266      | 6   | 0.0057        | 0.0041        | 0.16            | 0.10            |
| <i>IFI30</i>    | ILMN_1807277      | 19  | 0.0005        | 0.0007        | 0.48            | 0.22            |
| <i>HLA-DOB</i>  | ILMN_1700428      | 6   | -0.0008       | 0.0012        | 0.49            | 0.22            |
| <i>HLA-DRB4</i> | ILMN_2159694      | 6   | -0.0052       | 0.0075        | 0.49            | 0.22            |
| <i>HLA-DRB5</i> | ILMN_1697499      | 6   | -0.0062       | 0.0093        | 0.50            | 0.23            |
| <i>HLA-DMB</i>  | ILMN_1761733      | 6   | -0.0004       | 0.0006        | 0.51            | 0.23            |
| <i>HLA-DQA1</i> | ILMN_1808405      | 6   | 0.0012        | 0.0030        | 0.69            | 0.28            |
| <i>HLA-DRB1</i> | ILMN_1715169      | 6   | -0.0033       | 0.0087        | 0.71            | 0.29            |

Effect size (Age beta), standard error (SE), and significance (P-value and FDR) for the associations of age with expression of 24 genes (31 mRNA expression transcripts (Illumina probe ID)) annotated as major histocompatibility complex (MHC) class I (n = 10) or class II genes (n = 14) in Pubmed; All age-associated (FDR ≤ 0.05) MHC genes have increasing expression associated with age (shown in bold; 10 genes; 14 mRNA expression transcripts) in 1,264 CD14+ monocyte samples
